# Supplementary material
Source: MDPI journal article supplement (https://www.mdpi.com/2073-4441/13/11/1517)
Supplement: s1 [file s1 › water-1180928-supplementary (1).pdf]

## Supplementary Material

# Green Space Optimization Strategy to Prevent Urban Flood Risk in the City Centre of Wuhan

**Table S1.** Procedure of passive submergence experiment based on SCS-CN model.

| Operation Procedure                                   | Input Data                                        | Analytical Tool                                                                                      | Calculation Result   |
|-------------------------------------------------------|---------------------------------------------------|------------------------------------------------------------------------------------------------------|----------------------|
| Homography                                            | Landuse (1)                                       | Data management-projection and transformation- create custom geographic (coordinate) transformations | WGS1984TOBEIJING1954 |
|                                                       | Dem (2)                                           | Data management- projection and transformation- raster-projection raster                             | Demtouying           |
|                                                       | Demtouying                                        | Spatial Analyst-hydrological analysis-land filling                                                   | Fill in the hole (4) |
|                                                       | Fill in the hole (4)                              | Spatial Analyst-hydrological analysis-flow direction                                                 | Flow to (5)          |
| Watershed Division                                    | Flow to (5)                                       | Spatial Analyst-hydrological analysis-flow                                                           | Flow (6)             |
|                                                       | Flow (6)                                          | Spatial Analyst-map algebra-raster calculator                                                        | The main stream      |
|                                                       | The main stream                                   | Spatial Analyst-hydrological analysis-river link                                                     | Trunk Link (8)       |
|                                                       | Trunk Link (8)                                    | Spatial Analyst-hydrological analysis-watershed                                                      | Watershed (9)        |
| Adding surface runoff coefficient CN to land use data | Watershed (9)                                     | Conversion tool- raster out-raster face                                                              | Watershed SL (10)    |
|                                                       | Land use Vector Data: Landuse (1)                 |                                                                                                      |                      |
|                                                       | Watershed Division vector data: Watershed SL (10) | Analysis tools-stack analysis-union                                                                  | Union (11)           |
|                                                       | Union (11)                                        | Property sheet-add field (CN)                                                                        | Union (11)           |

|                                                                               |                                                |                                                                                                                                                                                         |                                                                                               |
|-------------------------------------------------------------------------------|------------------------------------------------|-----------------------------------------------------------------------------------------------------------------------------------------------------------------------------------------|-----------------------------------------------------------------------------------------------|
| Calculating the area of land blocks with different land use properties        | Union (11)                                     | Property sheet-add field (LUs) floating-point-compute geometry- compute area (m <sup>2</sup> )                                                                                          | Union (11)                                                                                    |
| Calculation of extreme daily submergence volume (SCS model) in each watershed | DBF file of the Union File (11-1)              | The submerging volume of each watershed was calculated by Excel-Lus and SCS model                                                                                                       | The inundated volume of each watershed under different heavy rainfall recurrence periods (12) |
|                                                                               | Watershed SL (10)                              | Select by property (gridcode = 1-6 in watershed SL)-right-click the "Watershed SL" layer-data-export data-export selected elements                                                      | Area factor data for each watershed: ly1- 6(13)                                               |
|                                                                               | Area factor data for each watershed: ly1-6(13) | Spatial Analyst- extraction and analysis-extraction according to curing membrane                                                                                                        | Basin surface raster data: DEM1-6(14)                                                         |
|                                                                               | Demtouying                                     |                                                                                                                                                                                         |                                                                                               |
| The submergence height of each basin is calculated                            |                                                | 3D Analyst- functional surface-surface volume- search for the most approximate submergence height H between the calculated surface volume and the submergence volume (12) of each basin | Submergence height H (15) in each basin                                                       |
|                                                                               | Basin surface raster data: DEM1-6(14)          |                                                                                                                                                                                         |                                                                                               |
|                                                                               | Basin surface raster data: DEM1-6(14)          |                                                                                                                                                                                         |                                                                                               |
|                                                                               | Submergence height H (15) in each basin        | Spatial analyzer-re-classification                                                                                                                                                      | Dem1-6 CFL                                                                                    |
| Visual representation                                                         | Dem1-6 CFL                                     | Data management tool-raster-raster data set-inlay to new raster                                                                                                                         | DEMCF 1,5,10,20... (17)                                                                       |

**Table S2.** Steps of water collection simulation experiment in small depression.

| Operation Procedure                                                        | Input Data            | Analytical Tool                                                                              | As a Result               |
|----------------------------------------------------------------------------|-----------------------|----------------------------------------------------------------------------------------------|---------------------------|
| Projection coordinate system                                               | Landuse (1)           | Data management tools-projection and transformation-create custom geographic transformations | WGS1984 TO BEIJING1954    |
|                                                                            | Dem (2)               | Data management tools-projection and transformation-raster-projection raster                 | Dem touting               |
|                                                                            | Dem touting           | Spatial Analyst-hydrological analysis-fill and cut                                           | Fill in the hole (4)      |
| Identify the drain point                                                   | Fill in the hole (4)  | Spatial Analyst-hydrological analysis-flow direction                                         | Flow to (5)               |
|                                                                            | Flow to (5)           | Spatial Analyst-hydrological analysis-sink                                                   | Sink                      |
| Divide the watershed (approximately active)                                | Sink                  |                                                                                              |                           |
|                                                                            | Flow to (5)           | Spatial Analyst-hydrological analysis-watershed                                              | A small depression        |
| Identify the lowest point of each watershed                                | A small depression    | Spatial Analyst-regional analysis-regional statistics                                        | Area statistics (8)       |
|                                                                            | Dem touting           |                                                                                              |                           |
| Identify tipping points for each watershed                                 | A small depression    | Spatial Analyst-zone analysis-zone filling                                                   | Area filling (9)          |
| Calculate the height difference between the dip point and the lowest point | Area statistics (8)   | Spatial Analyst-map algebra-grid calculator-"Area filling"(9)-"Area statistics"(8)           | In a small depression     |
|                                                                            | Area filling (9)      |                                                                                              |                           |
| Visual representation                                                      | In a small depression | Spatial analyzer-re-classification                                                           | Small Hollow H --CFL (11) |
